# Supplementary material for: Targeted mutagenesis using CRISPR/Cas system in medaka
Source: PubMed Central journal article supplement (PMC4021358; doi:10.1242/bio.20148177), 2014-04-11
Supplement: supp_bio.20148177_bio.20148177-s1.pdf [file supp_bio.20148177_bio.20148177-s1.pdf]

## Supplementary Material

Satoshi Ansai and Masato Kinoshita doi: 10.1242/bio.20148177

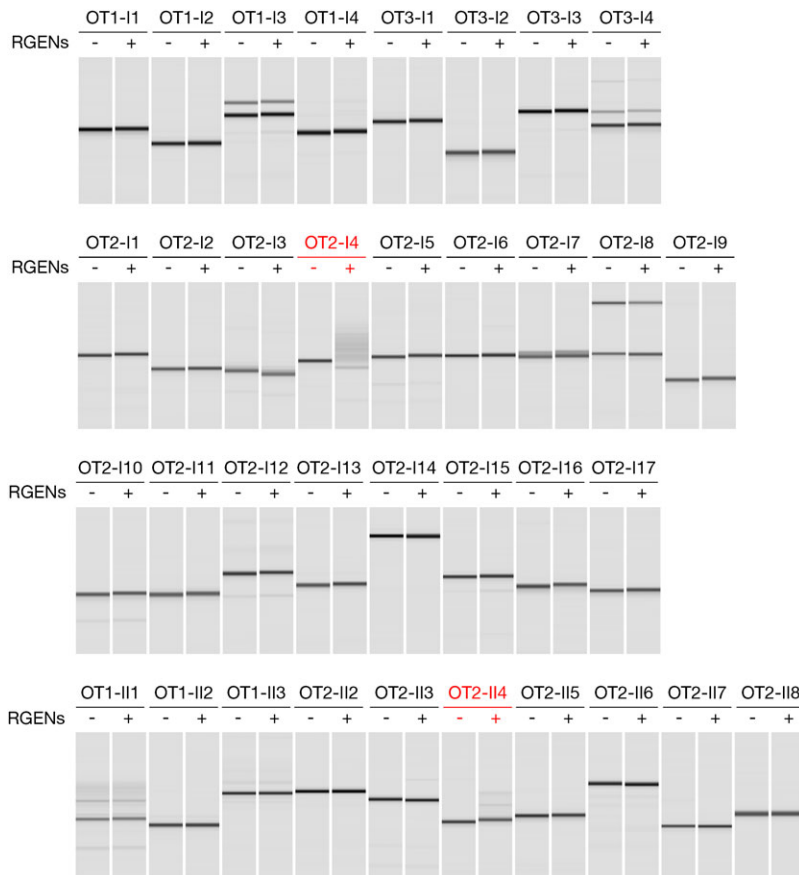

**Fig. S1. MultiNA gel images of heteroduplex mobility assay (HMA) for detecting off-target alterations.** Potential off-target loci for target no. 1 (OT1), no. 2 (OT2), or no. 3 (OT3) were analyzed using the mixture of genomic DNA extracted from 12 embryos that were injected with 100 ng/ $\mu$ L of Cas9 RNA and either 25 ng/ $\mu$ L of sgRNA no. 1, 2a, or 3a, respectively. I and II indicate the potential off-target loci identified by criteria (i) and (ii). Sequences of the off-target loci and primers used for HMA were listed in supplementary material Tables S3 and S4. Red letters indicate two mutagenized off-target loci (OT2-14 and OT2-114).

**Table S1. Primer sequences used in this study**

| Name         | Sequence (5'–3')                 | Usage                                    |
|--------------|----------------------------------|------------------------------------------|
| hSpCas9FW    | GCAGGATCGCCACCATGGACTATAAGGAC    | Cloning of hSpCas9 into the pCS2+ vector |
| hSpCas9RV    | AGTTCTAGATTACTTTTTCTTTTTTGCCTGGC | Cloning of hSpCas9 into the pCS2+ vector |
| DJ1-FW2      | TGTGACTGTAGCGGGTCTGA             | HMA, RFLP                                |
| DJ1-RV1      | GTGTGAACAACGCTGCATTT             | RFLP, direct sequencing                  |
| DJ1-RV2      | GTCGCAATTGCCATCACTTT             | HMA                                      |
| DJ1-FW3      | CAGGAATTCTTTTTGTCTCTTGGTGGTGCT   | Subcloning into the pBluescript vector   |
| DJ1-RV3      | CCCCTCGAGGTGTGAACAACGCTGCATTT    | Subcloning into the pBluescript vector   |
| M13-FW       | GTA AACGACGGCCAGT                | Sequencing                               |
| M13-RV       | GGAAACAGCTATGACCATG              | Sequencing                               |
| T7 promoter  | TAATACGACTCACTATAGGG             | Sequencing                               |
| SP6 promoter | TATTTAGGTGACACTATAG              | Sequencing                               |

**Table S2. Oligonucleotide sequences used for construction of sgRNAs**

| sgRNA ID | Direction  | Sequence (5'–3')         |
|----------|------------|--------------------------|
| No. 1    | Sense      | TAGGCCTCTTCCAAGCTAGTAT   |
|          | Anti-sense | AAACATACTAGCTTGGAAAGAGG  |
| No. 2a   | Sense      | TAGGTCCAGTGCAGCAGAAACG   |
|          | Anti-sense | AAACCGTTTCTGCTGCACTGGA   |
| No. 2b   | Sense      | TAGGCGTCCAGTGCAGCAGAAACG |
|          | Anti-sense | AAACCGTTTCTGCTGCACTGGACG |
| No. 3a   | Sense      | TAGGTCTGTCCCGATACTAGCT   |
|          | Anti-sense | AAACAGCTAGTATCGGGACAGA   |
| No. 3b   | Sense      | TAGGCATCTGTCCCGATACTAGCT |
|          | Anti-sense | AAACAGCTAGTATCGGGACAGATG |

**Table S3. Potential off-target sequences identified by criterion (i) in medaka genome**

| Target       | Site name               | Sequence (5'–3')             | Chromosome position          | Forward PCR primer          | Reverse PCR primer     |                          |
|--------------|-------------------------|------------------------------|------------------------------|-----------------------------|------------------------|--------------------------|
| sgRNA no. 1  | Target 1                | GGCCTCTCCAAAGCTAGTATCGG      | chr5: 7,477,613-7,477,591    | TGTGACTGATGCGGGTCTGA        | GTCCCAATTGCCATCATT     |                          |
|              | OT1-1a                  | CGGTAAACCCCAAGCTAGTATTGG     | chr8: 4,153,407-4,153,385    | AAAGTTTTCTGGTCCCATTGT       | GTAAGGGTAAAGGGGGCTGCT  |                          |
|              | OT1-1b                  | CGTGAACCCCAAGCTAGTATTGG      | chr8: 4,156,178-4,156,156    | AAAGTTTTCTGGTCCCATTGT       | GTAAGGGTAAAGGGGGCTGCT  |                          |
|              | OT1-12                  | TAGGTAACAACCAAGCTAGTATCGG    | chr8: 9,508,743-9,508,765    | TGCCACCAAGGATTAAGACA        | CCCTGCATGATTTCCAGTTT   |                          |
|              | OT1-13                  | GTATATTACCAAGCTAGTATTGG      | chr9: 15,422,034-15,422,012  | CTGGCTTTTCAAGCGAATA         | GGCCATCTTCTCCAGTCTGG   |                          |
|              | OT1-14                  | GTTTTGCAACCAAGCTAGTATCGG     | chr16: 21,913,658-21,913,680 | AGAAAAAGCTGGAGCAAAA         | TACGCTCAGACCCGGGTACA   |                          |
|              | sgRNA no. 2a            | Target 2                     | CGTCCAGTGCAGCAGAAACCGGG      | chr5: 7,477,559-7,477,581   | TGTGACTGATGCGGGTCTGA   | GTCCCAATTGCCATCATT       |
|              |                         | OT2-11                       | CTCCTCCGGCAGCAGAAACCGGG      | chr1: 34,070,805-34,070,827 | GGCAATCAAGGAACAGAAATGA | TAAAGTCCCTCTCCCTTC       |
|              |                         | OT2-12                       | AGAGCATCGCAGCAGAAACCGGG      | chr1: 38,622,323-38,622,301 | CCGCAACTCCAGTCACTCT    | CGTGAATTTCCCAAGAAATC     |
|              |                         | OT2-13                       | CTGAAAGTGCAGCAGAAACCGGG      | chr4: 6,616,842-6,616,820   | GGACTGGACAGTTTGGAGGA   | TGATGTGAAGGTGGACATGC     |
|              |                         | OT2-14                       | AGTCTAGAAGCAGCAGAAACCGGG     | chr4: 20,089,705-20,089,727 | AGAAGTCCGGTGTAAACAGCA  | TCTAGACTGGGGCATGTGAC     |
|              |                         | OT2-15                       | TAGGAGCAGCAGCAGAAACCGGG      | chr5: 24,232,491-24,232,469 | AGAGCAGAGCAGGCCAGAG    | AGGGGATCAACAACAATGGA     |
|              |                         | OT2-16                       | CAAGGACAGCAGCAGAAACCGGG      | chr8: 14,070,959-14,070,981 | AGGCAACAGGAGGAGAAACA   | GCTGCTGGAGGATCTGT        |
|              |                         | OT2-17                       | CAAAATGTTGCAGCAGAAACCGGG     | chr8: 17,753,755-17,753,733 | GCAAGGTGATACAGGATGGA   | TCACCGATTTACCAAAATTTGAAC |
| OT2-18       |                         | TGCAGATTGCAGCAGAAACCGGG      | chr9: 29,205,714-29,205,692  | GGACATTTTAAACACCCCAAA       | GGACATGTGCGCATATAAA    |                          |
| OT2-19       |                         | AGCATGACGCAGCAGAAACCGGG      | chr9: 30,256,570-30,256,592  | AAGGCCGATAACAAGACTTCC       | CCTGTGTGAGGAAGATGAAGG  |                          |
| OT2-10       |                         | CACTCCCTGCAGCAGAAACCGGG      | chr10: 26,433,826-26,433,804 | GGATTGGAGGAGGTTTCAATC       | CCTGTGTGAGGAAGATGAAGG  |                          |
| OT2-11       |                         | CAATGAGTGCAGCAGAAACCGGG      | chr12: 2,746,166-2,746,144   | TGTCATGTTCCCTTTTGTGCC       | CAGGCTGAACATCATTTTGG   |                          |
| OT2-12       |                         | TGATTTGCCAGCAGAAACCGGG       | chr13: 2,841,517-2,841,539   | GCGCAATTCACATCCAAAT         | CAACACCGACTGAAATGTGTG  |                          |
| OT2-13       |                         | CTGGAGCCGAGCAGAAACCGGG       | chr13: 19,092,675-19,092,653 | GTTCTCTCTCATGGCGTTG         | TGCTTTTAAATGTGCAGCCAAA |                          |
| OT2-14       | ATGAAAAGCAGCAGAAACCGGG  | chr15: 14,490,114-14,490,136 | GCTGAAATGTAATTTGGAGCA        | CCCAGTTCCCTTTGACTGAC        |                        |                          |
| OT2-15       | CTGGAATGCAGCAGAAACCGGG  | chr18: 29,247,728-29,247,706 | GGACGGTAAACTTCGTCTGG         | CAGCCAATGCTAAATGTGTGTC      |                        |                          |
| OT2-16       | TTCTGAGCAGCAGAAACCGGG   | chr23: 3,690,537-3,690,559   | GTTCTGTCATCCCTGAGC           | TTCTGGAGTTTGAGTGAAGC        |                        |                          |
| OT2-17       | ATTTCTTGGCAGCAGAAACCGGG | chr24: 12,802,667-12,802,645 | AAGAAATGCTGGGGATGTTG         | CAAGAAACCTGCAGGAGGAG        |                        |                          |
| sgRNA no. 3a | Target 3                | CACTGTCCCGATACTAGCTTGG       | chr5: 7,477,583-7,477,605    | TGTGACTGATGCGGGTCTGA        | GCAAACACGTTTCCCAAAT    |                          |
|              | OT3-11                  | GCTCCAAACCCGATACTAGCTTGG     | chr8: 9,508,773-9,508,751    | CCCCTGCATGATTTCCAGTTT       | GTCCCAATTGCCATCATT     |                          |
|              | OT3-12                  | GTAGCTGCCCCGATACTAGCTAGG     | chr10: 8,557,430-8,557,408   | CACATGTTCAAGGTGTTCA         | TGCCACCAAGGATTAAGACA   |                          |
|              | OT3-13                  | GACTCTACCCCGATACTAGCTTGG     | chr16: 21,913,688-21,913,666 | TACGCTCAGACCCGGGTACA        | TGTGACACGATCTGAACCTGA  |                          |
| OT3-14       | TGACCTATCCGATACTAGCTAGG | chr18: 1,045,229-1,045,207   | GCCTTACGCCCTCTGATGA          | AGAAAAAGCTGGAGCAAAA         |                        |                          |

Primer sequences for mutation analysis are also shown. Red letters indicate a mutagenized off-target locus.

Table S4. Potential off-target sequences identified by criterion (ii) in medaka genome

| Target       | Site name        | Sequence (5'–3')         | Chromosome position          | Forward PCR primer      | Reverse PCR primer         |
|--------------|------------------|--------------------------|------------------------------|-------------------------|----------------------------|
| sgRNA no. 1  | Target 1         | GGCCTCTTCCAAGCTAGTATCGG  | chr5: 7,477,613-7,477,591    | TGTGACTGTAGCGGGTCTGA    | GTCCGAATTGCCCATCACTTT      |
|              | OT1-I11          | TTTCTCATCCAAGCTAGTATCAG  | chr7: 8,868,188-8,868,210    | CCTCCCTGCAGACAATAAG     | CTAGCTACAGCCCCCTCTCA       |
|              | OT1-I12          | TTCTCTGTTCCAAGCTGGTATCAG | chr16: 8,282,950-8,282,932   | TGCCACCAAGGATTAAGACA    | CCCTTGCATGATTTTCAGTTT      |
|              | OT1-I13          | TTCTCTCATCCAAGCTAGCATCAG | chr23: 5,103,587-5,103,609   | CTGGCTTTTCAAGGCCGAATA   | GGCCATCTTCTTCAAGTCTGG      |
|              | OT1-I14*         | TTCTCTCATCCAAGCTAGCATCAG | chr15: 20,255,083-20,255,063 | TGCTCTGCTCCATTCTGATG    | CACCTAGCTTACAGCCCCCTCAA    |
|              |                  |                          |                              | ACAAGTCCCTGCTCTGCTC     | TTTGCACCTCTCTCCCACTAGC     |
| sgRNA no. 2a | Target 2         | CGTCCAGTGCAGCAGAAAACGTGG | chr5: 7,477,559-7,477,581    | TGTGACTGTAGCGGGTCTGA    | GTCCGAATTGCCCATCACTTT      |
|              | OT2-I11 (OT2-I4) | AGTCTAGAGCAGCAGAAAACGGGG | chr4: 20,089,705-20,089,727  | AGAAAAGTCGGTGGTAAACAGCA | TCTAGACTCGGGCATGTGAC       |
|              | OT2-I12          | GCTCCAGTGCAGCAGACATGTAG  | chr5: 18,780,520-18,780,498  | GATGATGTGCCAGAGGAAAAA   | TCCCTGCTACAGGTCACCAT       |
|              | OT2-I13          | AAACCAGTGCAGCAGAAAACGTGG | chr9: 10,268,750-10,268,728  | AGAGTGAAGCGTACACCTG     | AAAAGTTTGCATGGGGTTCTG      |
|              | OT2-I14          | AATTCAGTGCAGCAGAAAACGGGG | chr12: 11,210,109-11,210,131 | GAAGGTAGTGGCCACCCAGAG   | TTGCTGTGGAGACGTGGTTA       |
|              | OT2-I15          | GCTCCAGGCAACAGAAAACGAAG  | chr13: 25,743,533-25,743,555 | ACCTAGCAGATCGGCTTTCA    | GGTTCAAAGTCTCCCCCTCA       |
|              | OT2-I16          | CTTCCATTCAGCAGAAAATGCAG  | chr15: 17,930,301-17,930,279 | AGTGGATTGCAACCAATGAA    | TGGAGACACATCAAATGTATTACTCA |
|              | OT2-I17          | ACTCCAGTGCATCAGAAAAGGAGG | chr15: 23,412,400-23,412,422 | CGGTAGCTCCTTCCACAAAAC   | AACAAGCCATCTGCAGTCCT       |
|              | OT2-I18          | TTTCCAGTGCAGCAGGAAAGGCAG | chr18: 1,639,052-1,639,030   | AGAGTGTAAACCCCGACGA     | GGTGACAATCTCTTATCCACA      |

Primer sequences for mutation analysis are also shown. Red letters indicate mutagenized off-target loci.

\*This off-target site could not be analyzed by heteroduplex mobility assay.
